# Supplementary material for: The benefits of combining an immunomodulator with a chemotherapy agent in chondrosarcoma : a proof of concept with mifamurtide
Source: Research Square preprint supplement (doi:10.21203/rs.3.rs-6954396/v1), 2025-07-27
Supplement: Supplementary file 1 [file 2eed4cb7b547aeba3bf755aa.docx]

**The benefits of combining an immunomodulator with a chemotherapy agent in chondrosarcoma : a proof of concept with mifamurtide**

**Rohan Quoniou*,1,£, Elisa Bortoli**,1,£, Emmanuel Moreau1,, Florent Cachin1,2, Emmanuel Chautard1,3,£, Caroline Peyrode***,1, £**

**1**Imagerie Moléculaire et Stratégies Théranostiques, UMR1240, Université Clermont Auvergne, INSERM, 63000 Clermont-Ferrand, France

**2**Service de Médecine Nucléaire, Centre Jean PERRIN, 63000 Clermont-Ferrand, France

**3**Service de Pathologie, Centre Jean PERRIN, 63000 Clermont-Ferrand, France

£: the authors have contributed equally

*1st autor: [rohanquoniou@yahoo.fr](mailto:rohan.quoniou@uca.fr)

** 1st co-autor: [elisa.bortoli@doctorant.uca.fr](mailto:elisa.bortoli@doctorant.uca.fr)
***: [caroline.peyrode@uca.fr](mailto:caroline.peyrode@uca.fr)

**A)**


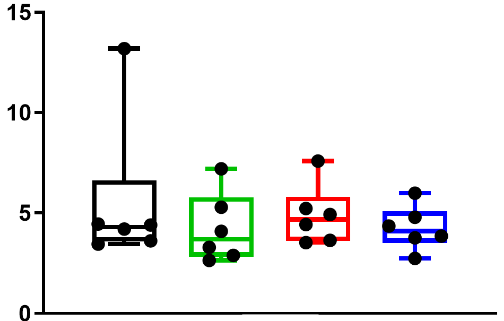

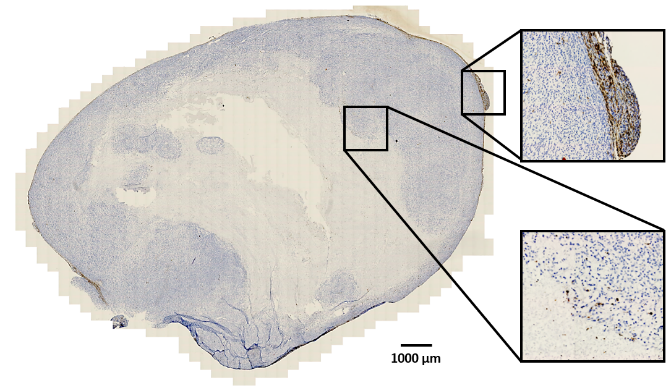


**Ctrl**

**Mifa**

**Doxo**

**Mifa + Doxo**

**Percentage of CD68+ cells**


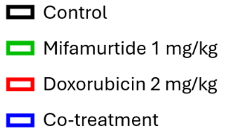

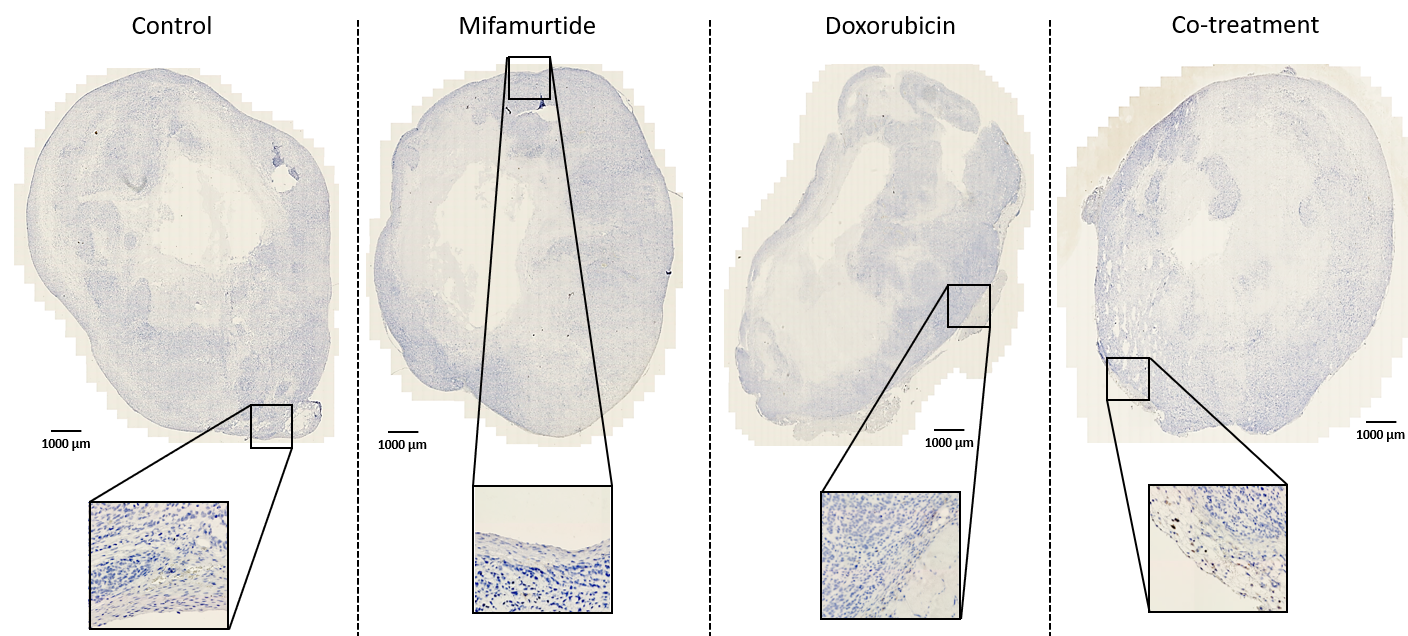


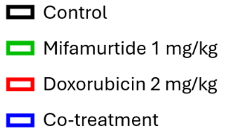

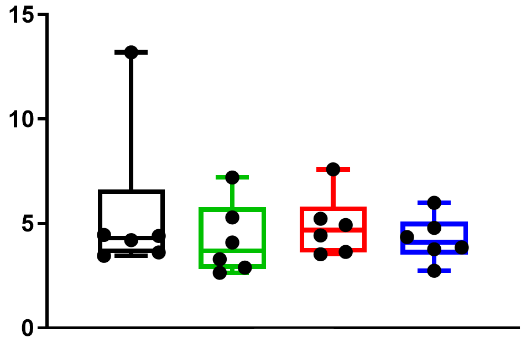

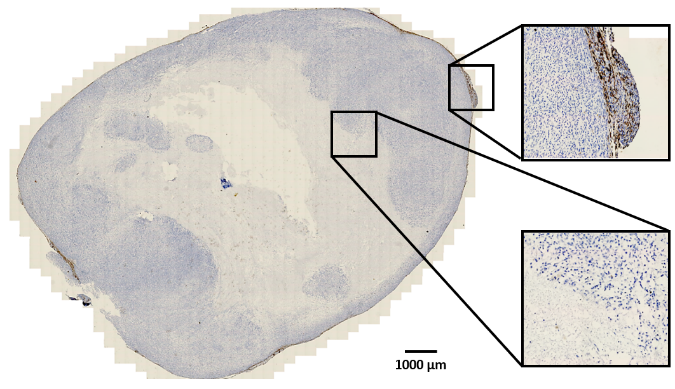


**Ctrl**

**Mifa**

**Doxo**

**Mifa + Doxo**

**Percentage of CD206+ cells**

**B)**

**C)**

**Figure S.1: Impact of treatments on the macrophages phenotype (late stage)**

**A**. and **B.** Left: Representative images of control tumour sections after IHC with **A.** CD68 (M0) or **B.** CD206 (M2). Right: Rate of positive labelled cells in % for each condition. **C.** Representative images of a tumour section for each condition after IHC with the CD86 marker (M1). Scales represent 1000µm. All data are expressed as mean values +/- standard deviation from the measurement of 6 mice per group. Statistical tests performed are two-factor ANOVA with no significant difference compared to control.
